# Supplementary material for: Serum carcinoembryonic antigen elevation in benign lung diseases
Source: PubMed Central journal article supplement (PMC8463604; doi:10.1038/s41598-021-98513-8), 2021-09-24
Supplement: 41598_2021_98513_MOESM1_ESM.pdf [file 41598_2021_98513_MOESM1_ESM.pdf]

## **Serum carcinoembryonic antigen elevation in benign lung diseases**

Yi Yang\*, Mingfang Xu\*, Huan Huang\*, Xiaolin Jiang, Kan Gong, Yun Liu, Xunjie Kuang, Xueqin Yang

## Supplementary

**Table 1 Patients' characteristics of CEA value above 5 ng/ml**

| No. | Sex | Age | CEA (ng/ml) | Respiratory diseases | Circulatory diseases | Digestive diseases | Endocrine diseases        | Immune diseases | RF or HF | Smoking index |
|-----|-----|-----|-------------|----------------------|----------------------|--------------------|---------------------------|-----------------|----------|---------------|
| 1   | F   | 79  | 5.00        | Pulmonary abscess    | Hypertension         |                    | Diabetes                  |                 |          | 0             |
| 2   | M   | 64  | 5.00        | Pneumonitis          |                      |                    |                           |                 |          | 0             |
| 3   | F   | 65  | 5.28        | IP                   |                      |                    | Diabetes                  |                 |          | 0             |
| 4   | M   | 59  | 5.33        | TB                   |                      |                    | Diabetes                  |                 |          | 0             |
| 5   | M   | 61  | 5.61        | IP                   |                      |                    |                           |                 |          | 600           |
| 6   | F   | 51  | 5.80        | COPD                 |                      |                    |                           |                 |          | 0             |
| 7   | F   | 70  | 5.14        | Bronchiectasis       | CAD,<br>Hypertension |                    |                           |                 |          | 0             |
| 8   | M   | 53  | 5.04        | COPD                 |                      |                    |                           |                 |          | 400           |
| 9   | M   | 60  | 5.11        | COPD                 |                      |                    |                           |                 |          | 1200          |
| 10  | F   | 59  | 5.12        | COPD                 | Hypertension         |                    | Diabetes, Low T3 syndrome |                 | RF       | 800           |
| 11  | M   | 74  | 5.12        | COPD                 |                      |                    |                           |                 |          | 800           |
| 12  | M   | 63  | 5.11        | COPD                 |                      |                    | Diabetes                  |                 |          | 800           |
| 13  | M   | 45  | 5.13        | IP                   |                      |                    |                           |                 |          | 400           |
| 14  | F   | 41  | 5.15        | IP                   |                      |                    |                           |                 |          | 0             |
| 15  | M   | 80  | 5.22        | ILD                  | Hypertension         |                    |                           |                 |          | 0             |
| 16  | M   | 34  | 5.26        | IP                   |                      |                    |                           |                 |          | 400           |
| 17  | F   | 81  | 5.26        | COPD                 |                      |                    |                           |                 |          | 0             |
| 18  | F   | 32  | 5.14        | PAP                  |                      |                    |                           |                 | RF       | 0             |
| 19  | M   | 29  | 5.77        | PAP                  |                      |                    |                           |                 |          | 280           |

|    |   |    |      |                |                             |                 |                 |                              |        |      |
|----|---|----|------|----------------|-----------------------------|-----------------|-----------------|------------------------------|--------|------|
| 20 | M | 78 | 5.22 | COPD           | CAD, AF, Hypertension       |                 |                 |                              | HF     | 1000 |
| 21 | F | 52 | 5.23 | CTD-ILD        | Pericardial effusion        |                 |                 | Sjogren's syndrome           | RF, HF | 0    |
| 22 | M | 72 | 5.27 | TB, Septicemia |                             | Gastric ulcer   |                 |                              |        | 0    |
| 23 | F | 88 | 5.30 | COPD           | CAD, Pacemaker implantation | Cholecystectomy |                 |                              | HF     | 0    |
| 24 | F | 63 | 5.30 | CTD-ILD        | Hypertension                |                 |                 | Systemic lupus erythematosus |        | 0    |
| 25 | M | 76 | 5.32 | COPD           |                             |                 |                 |                              |        | 1000 |
| 26 | M | 60 | 5.36 | Pneumonitis    | Valvular disease            | Cholelithiasis  | Diabetes        |                              |        | 900  |
| 27 | M | 77 | 5.37 | Pneumothorax   | CAD, Hypertension           |                 | Hyperthyroidism |                              | RF ,HF | 300  |
| 28 | F | 62 | 5.37 | Pneumonitis    |                             |                 |                 | AIDS                         |        | 0    |
| 29 | F | 81 | 5.39 | COPD           | CAD, Hypertension           |                 | Diabetes        |                              |        | 0    |
| 30 | M | 80 | 5.42 | COPD           | Hypertension                |                 |                 |                              | RF     | 750  |
| 31 | M | 47 | 5.43 | Pneumonitis    | Hypertension                |                 |                 |                              |        | 400  |
| 32 | M | 63 | 5.45 | Bronchiectasis |                             |                 |                 |                              |        | 1000 |
| 33 | F | 79 | 5.45 | COPD, PE       | CAD, Hypertension           |                 |                 |                              | HF     | 0    |
| 34 | M | 46 | 5.48 | Pneumonitis    | Hypertension                | Cholecystectomy |                 |                              |        | 600  |
| 35 | M | 75 | 5.56 | COPD           | CAD, Hypertension           |                 |                 |                              | HF     | 0    |
| 36 | F | 82 | 5.58 | COPD           | Hypertension                |                 |                 |                              | HF     | 0    |
| 37 | F | 56 | 5.60 | Pneumonitis    |                             |                 | Diabetes        |                              | RF     | 0    |
| 38 | M | 47 | 5.43 | CTD-ILD        | Hypertension                |                 |                 | IIM                          |        | 400  |

|    |   |    |      |                 |                          |               |          |    |        |      |
|----|---|----|------|-----------------|--------------------------|---------------|----------|----|--------|------|
| 39 | M | 90 | 5.71 | COPD            | Hypertension             |               |          |    |        | 0    |
| 40 | M | 77 | 5.72 | COPD            | Valvular disease         | Gastric ulcer |          |    | HF     | 0    |
| 41 | M | 82 | 5.72 | COPD            | Hypertension             | Gastric ulcer |          |    |        | 800  |
| 42 | M | 62 | 5.73 | COPD            |                          |               |          | RA |        | 800  |
| 43 | F | 65 | 5.74 | COPD            | CAD,<br>Hypertension     |               | Diabetes |    | RF, HF | 0    |
| 44 | M | 68 | 5.76 | Bronchiectasis  | Hypertension             |               | Diabetes |    |        | 0    |
| 45 | M | 53 | 5.76 | Pneumonitis, PE |                          |               |          |    |        | 0    |
| 46 | F | 40 | 5.78 | CTD-ILD         |                          |               |          |    |        | 0    |
| 47 | M | 49 | 5.78 | Pneumonitis     |                          |               |          |    |        | 600  |
| 48 | F | 52 | 5.83 | TB              | Hypertension             |               |          |    |        | 0    |
| 49 | M | 43 | 5.85 | Pneumonitis     |                          |               |          |    |        | 100  |
| 50 | F | 74 | 5.97 | CTD-ILD         |                          | Cirrhosis     |          | RA | RF     | 0    |
| 51 | F | 55 | 5.99 | PAP             | Hypertension             |               |          |    |        | 0    |
| 52 | M | 44 | 6.06 | Pneumonitis,    |                          |               |          |    | RF     | 200  |
| 53 | M | 86 | 6.12 | COPD            | CAD, Valvular<br>disease |               |          |    |        | 1000 |
| 54 | M | 61 | 6.16 | COPD            |                          |               |          |    | RF     | 0    |
| 55 | M | 52 | 6.18 | ILD             |                          |               | Diabetes |    |        | 0    |
| 56 | F | 52 | 6.27 | ILD             |                          |               | Diabetes |    | RF     | 0    |
| 57 | M | 65 | 6.29 | COPD            | Hypertension             |               |          |    |        | 400  |
| 58 | F | 65 | 6.30 | Pneumonitis     |                          |               |          |    |        | 0    |
| 59 | M | 71 | 6.37 | COPD            |                          |               |          |    |        | 0    |
| 60 | F | 61 | 6.44 | TB              | CAD                      |               | Diabetes |    |        | 0    |
| 61 | M | 39 | 6.50 | Asthma          |                          |               |          |    |        | 0    |
| 62 | F | 69 | 6.51 | COPD            | CAD                      |               |          |    | RF, HF | 0    |

|    |   |    |      |                        |                       |                                     |          |      |    |      |
|----|---|----|------|------------------------|-----------------------|-------------------------------------|----------|------|----|------|
| 63 | F | 65 | 6.50 | CTD-ILD                | Valvular disease      |                                     |          |      |    | 400  |
| 64 | F | 74 | 6.65 | CTD-ILD                | CAD                   |                                     | Diabetes |      |    | 0    |
| 65 | M | 81 | 6.55 | COPD                   |                       |                                     |          |      |    | 1200 |
| 66 | M | 50 | 6.61 | Pneumothorax           |                       |                                     |          |      |    | 0    |
| 67 | M | 75 | 6.07 | IP                     |                       |                                     |          |      |    | 600  |
| 68 | M | 34 | 6.18 | IP                     |                       |                                     |          |      |    | 0    |
| 69 | M | 50 | 6.57 | IP                     |                       |                                     |          |      |    | 600  |
| 70 | F | 65 | 6.63 | COPD                   |                       |                                     |          |      |    | 0    |
| 71 | M | 65 | 6.70 | IP                     |                       |                                     |          |      |    | 600  |
| 72 | F | 71 | 6.82 | Pulmonary embolism, PE | CAD                   |                                     |          |      | HF | 0    |
| 73 | M | 70 | 6.85 | COPD                   |                       | Cholelithiasis ,<br>Cholecystectomy | Diabetes |      |    | 1000 |
| 74 | M | 71 | 6.98 | COPD                   | CAD                   |                                     |          |      |    | 1000 |
| 75 | M | 61 | 6.25 | COP                    |                       |                                     |          |      |    | 900  |
| 76 | M | 29 | 6.26 | Pulmonary abscess      |                       |                                     |          | AIDS |    | 200  |
| 77 | F | 77 | 6.35 | IP                     |                       |                                     |          |      |    | 0    |
| 78 | M | 50 | 6.61 | Pneumothorax           |                       |                                     |          |      |    | 0    |
| 79 | M | 59 | 7.06 | COPD                   |                       |                                     | Diabetes |      |    | 0    |
| 80 | F | 80 | 7.09 | COPD                   | Hypertension ,<br>CAD | Cholecystectomy                     | Diabetes |      |    | 0    |
| 81 | F | 79 | 7.09 | COPD                   |                       |                                     |          |      |    | 600  |
| 82 | M | 61 | 7.09 | Bronchiectasis         |                       |                                     |          |      |    | 1500 |
| 83 | M | 75 | 7.09 | Pneumonitis            | CAD,<br>Hypertension  |                                     | Diabetes |      | RF | 800  |
| 84 | F | 72 | 7.14 | COPD                   | Hypertension          |                                     |          |      | HF | 0    |

|     |   |    |      |                   |                      |                          |                 |  |    |      |
|-----|---|----|------|-------------------|----------------------|--------------------------|-----------------|--|----|------|
| 85  | M | 58 | 7.15 | COPD              |                      |                          |                 |  |    | 0    |
| 86  | M | 84 | 7.15 | COPD              | CAD,<br>Hypertension |                          |                 |  | HF | 800  |
| 87  | M | 72 | 7.19 | COPD              |                      |                          | Diabetes        |  |    | 1040 |
| 88  | F | 79 | 5.60 | Pneumonitis       | CAD                  |                          | Diabetes        |  | HF | 0    |
| 89  | M | 77 | 7.29 | Pneumonitis       |                      |                          |                 |  |    | 0    |
| 90  | M | 64 | 7.31 | COPD              |                      |                          |                 |  |    | 400  |
| 91  | M | 63 | 7.31 | ILD               |                      |                          |                 |  |    | 0    |
| 92  | M | 64 | 7.32 | COPD              |                      |                          | Diabetes        |  |    | 400  |
| 93  | M | 75 | 7.37 | COPD              | Hypertension         |                          | Diabetes        |  | RF | 200  |
| 94  | F | 68 | 7.42 | COPD              |                      |                          |                 |  | RF | 0    |
| 95  | M | 52 | 7.55 | Pneumonitis       | Hypertension         |                          | Diabetes        |  |    | 0    |
| 96  | M | 52 | 7.64 | COPD              | Hypertension         |                          | Hyperthyroidism |  |    | 200  |
| 97  | M | 68 | 7.74 | COPD              | Hypertension         |                          |                 |  |    | 400  |
| 98  | F | 48 | 7.20 | Asthma            |                      |                          |                 |  |    | 0    |
| 99  | M | 75 | 7.37 | COPD              | Hypertension         |                          | Diabetes        |  | RF | 1000 |
| 100 | M | 66 | 7.75 | TB                |                      |                          | Diabetes        |  |    | 1200 |
| 101 | F | 72 | 7.90 | CTD-ILD           | Hypertension         |                          | Diabetes        |  |    | 0    |
| 102 | F | 61 | 8.08 | Asthma            | Hypertension         |                          |                 |  |    | 0    |
| 103 | M | 78 | 8.41 | COPD              | CAD                  |                          | Diabetes        |  | HF | 900  |
| 104 | M | 59 | 8.56 | ILD               |                      | Liver<br>transplantation | Diabetes        |  |    | 300  |
| 105 | M | 75 | 8.95 | COPD              | CAD                  |                          |                 |  |    | 1000 |
| 106 | M | 73 | 8.12 | Pneumonitis       | Hypertension         | Cholecystectomy          | Hyperthyroidism |  |    | 0    |
| 107 | M | 52 | 8.18 | Pneumonitis       | Hypertension         |                          |                 |  |    | 0    |
| 108 | M | 68 | 8.40 | Pulmonary abscess |                      |                          | Diabetes        |  |    | 800  |

|     |   |    |       |                |                                             |                   |                        |                        |    |      |
|-----|---|----|-------|----------------|---------------------------------------------|-------------------|------------------------|------------------------|----|------|
| 109 | M | 72 | 8.45  | CTD-ILD        | Myocardial infarction, Pericardial effusion |                   |                        | RA, IIM                |    | 0    |
| 110 | M | 60 | 8.70  | Bronchiectasis |                                             |                   |                        |                        |    | 600  |
| 111 | M | 51 | 8.56  | Pneumonitis    |                                             |                   |                        | AIDS                   |    | 300  |
| 112 | F | 80 | 8.95  | COPD           | Valvular disease                            |                   |                        |                        |    | 0    |
| 113 | M | 51 | 8.98  | CTD-ILD        |                                             |                   | Autoimmune thyroiditis | Autoimmune thyroiditis | RF | 0    |
| 114 | M | 80 | 9.00  | COPD, PE       |                                             |                   |                        |                        | RF | 500  |
| 115 | M | 67 | 9.20  | COPD           |                                             |                   |                        |                        |    | 0    |
| 116 | M | 53 | 9.43  | IP             |                                             |                   |                        |                        |    | 400  |
| 117 | M | 43 | 9.43  | IP             |                                             |                   |                        |                        |    | 0    |
| 118 | M | 53 | 9.43  | IP             |                                             |                   |                        |                        |    | 400  |
| 119 | F | 83 | 9.57  | COPD           | CAD                                         | Cirrhosis         | Diabetes               |                        |    | 0    |
| 120 | M | 68 | 9.69  | COPD           |                                             |                   |                        |                        |    | 800  |
| 121 | M | 61 | 9.89  | TB             |                                             |                   |                        |                        |    | 1200 |
| 122 | M | 53 | 10.01 | COPD           | Hypertension                                | Intestinal polyps |                        |                        |    | 500  |
| 123 | F | 43 | 10.04 | Asthma         |                                             |                   |                        |                        |    | 0    |
| 124 | M | 74 | 10.08 | Pneumonitis    | Hypertension                                |                   | Diabetes               |                        |    | 0    |
| 125 | M | 77 | 10.08 | ILD            |                                             |                   |                        |                        |    | 0    |
| 126 | M | 72 | 10.18 | TB             |                                             |                   |                        |                        |    | 1200 |
| 127 | M | 77 | 10.42 | Asthma         |                                             |                   |                        |                        | RF | 800  |
| 128 | M | 72 | 10.75 | COPD           |                                             |                   | Diabetes               |                        |    | 500  |
| 129 | M | 85 | 10.93 | COPD           | CAD                                         | Cholelithiasis    |                        |                        |    | 600  |
| 130 | M | 40 | 10.95 | PAP            |                                             |                   |                        |                        |    | 200  |

|     |   |    |       |                    |                      |                 |                 |     |        |     |
|-----|---|----|-------|--------------------|----------------------|-----------------|-----------------|-----|--------|-----|
| 131 | F | 47 | 11.14 | COPD               |                      |                 |                 |     |        | 0   |
| 132 | M | 74 | 11.21 | COPD               | Hypertension         | Cholecystectomy |                 |     |        | 800 |
| 133 | F | 57 | 11.22 | IP                 |                      |                 |                 |     |        | 0   |
| 134 | M | 75 | 11.26 | COPD               | CAD                  |                 | Diabetes        |     | RF, HF | 600 |
| 135 | M | 66 | 11.38 | PAP                |                      | Gastric ulcer   |                 |     |        | 0   |
| 136 | M | 51 | 11.73 | Pulmonary abscess  |                      |                 |                 |     |        | 400 |
| 137 | M | 78 | 11.78 | COPD               | CAD,<br>Hypertension |                 |                 |     |        | 0   |
| 138 | M | 69 | 11.78 | Pulmonary embolism |                      |                 |                 |     | RF     | 300 |
| 139 | M | 74 | 11.82 | COPD               | CAD,<br>Hypertension |                 |                 |     | HF     | 0   |
| 140 | M | 47 | 11.97 | COPD               |                      |                 |                 |     | RF     | 600 |
| 141 | F | 81 | 12.49 | COPD               | CAD,<br>Hypertension |                 | Diabetes        |     | HF     | 0   |
| 142 | M | 71 | 14.35 | COPD,              | AF                   |                 | Thyroid adenoma |     | RF     | 0   |
| 143 | M | 53 | 15.13 | Pneumonitis, PE    |                      |                 |                 |     |        | 300 |
| 144 | F | 75 | 17.33 | COPD               | CAD,<br>Hypertension |                 |                 |     | HF     | 0   |
| 145 | M | 70 | 19.02 | CTD-ILD            |                      |                 |                 | RA  |        | 0   |
| 146 | F | 60 | 19.23 | CTD-ILD            | CAD                  |                 | Diabetes        | IIM | HF     | 0   |
| 147 | F | 76 | 24.25 | ILD                |                      | Cholelithiasis  |                 |     | RF     | 0   |
| 148 | M | 43 | 28.02 | PAP                |                      |                 |                 |     |        | 200 |
| 149 | F | 52 | 40.12 | COP                |                      |                 |                 |     |        | 0   |

COPD: Chronic obstructive pulmonary disease; CAD: coronary artery disease; AF: atrial fibrillation; TB: Tuberculosis; RF: Respiratory failure;; HF: Heart



failure; PAP: Pulmonary alveolar proteinosis; PE: Pleural effusion; IP: Inflammatory pseudotumor; CTD-ILD: Connective tissue disease-associated interstitial lung disease; IIM: idiopathic inflammatory myopathies; RA: Rheumatoid arthritis; ILD: Interstitial lung disease; COP: cryptogenic organizing pneumonia
